# Supplementary material for: The Impact of Storage Temperature on the Development of Microbial Communities on the Surface of Blueberry Fruit
Source: MDPI journal article supplement (doi:10.3390/foods12081611), 2023-04-11
Supplement: s1 [file s1]

## Supplementary Materials

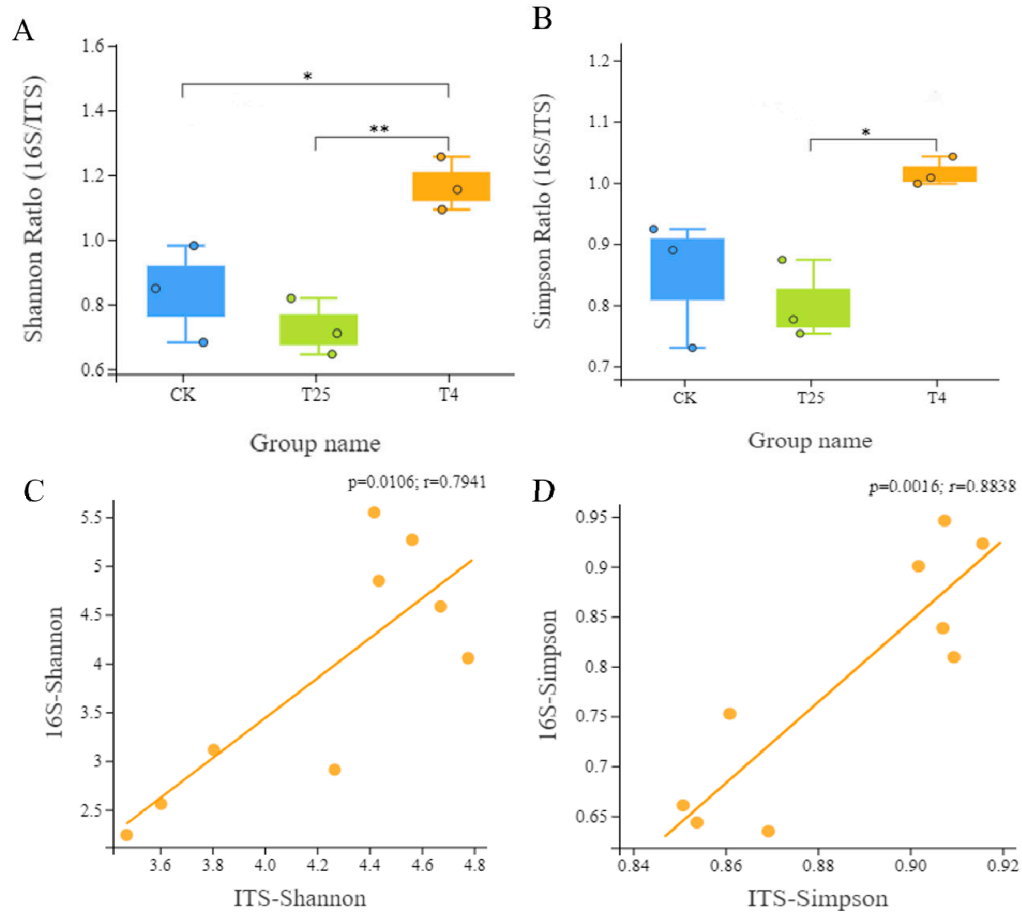

Figure S1. Scatter diagram of ratio difference between 16S and ITS Shannon and Simpson diversity indexes (\* $p < 0.05$ , \*\* $p < 0.01$ ).

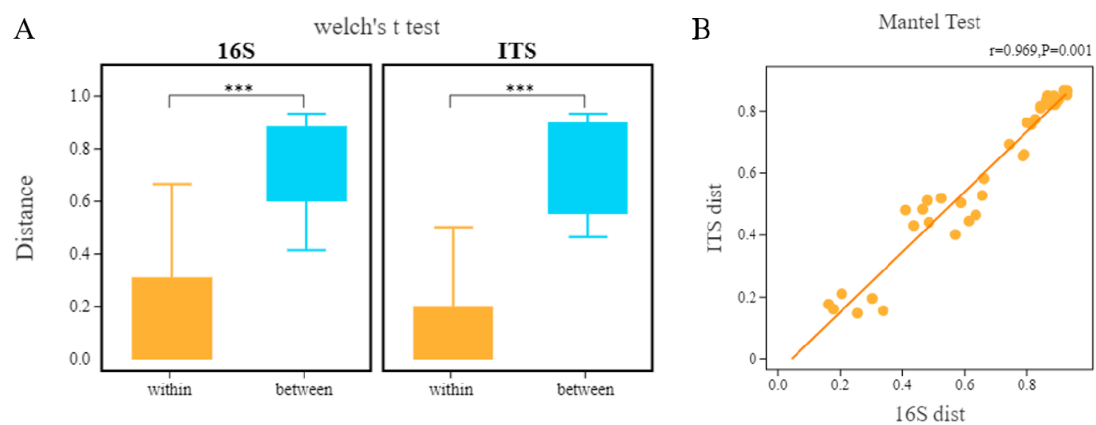

Figure S2. A and B for box plots of  $\alpha$ -diversity index of bacterial and fungal microbial communities Shannon and Simpson index intra- and inter-group validation. C and D for scatter plot of distance between two pairs of ITS and 16S sequencing data ( $***p < 0.001$ ).

Table S1. Statistical results of bacterial and fungal alpha diversity.

| Items      | No. | Name                       | CK <sub>1</sub> | CK <sub>2</sub> | CK <sub>3</sub> | T <sub>25-1</sub> | T <sub>25-2</sub> | T <sub>25-3</sub> | T <sub>4-1</sub> | T <sub>4-2</sub> | T <sub>4-3</sub> |
|------------|-----|----------------------------|-----------------|-----------------|-----------------|-------------------|-------------------|-------------------|------------------|------------------|------------------|
| 16S-Phylum | 1   | <i>Proteobacteria</i>      | 42.2976         | 39.508<br>7     | 29.658<br>2     | 87.155<br>9       | 89.926<br>8       | 92.792<br>8       | 64.301<br>3      | 59.371<br>1      | 68.72            |
|            | 2   | <i>Cyanobacteria</i>       | 45.2418         | 43.839<br>3     | 62.689<br>7     | 4.3805            | 4.069             | 5.6399            | 10.833<br>7      | 20.868<br>1      | 18.425<br>4      |
|            | 3   | <i>Actinobacteria</i>      | 3.7695          | 5.9862          | 2.2106          | 7.3402            | 5.329             | 0.9596            | 13.412<br>7      | 10.895           | 5.9214           |
|            | 4   | <i>Bacteroidetes</i>       | 2.3239          | 3.1058          | 2.5415          | 0.231             | 0.1876            | 0.1418            | 4.6077           | 3.1042           | 1.6206           |
|            | 5   | <i>Firmicutes</i>          | 0.8725          | 4.7937          | 1.232           | 0.3854            | 0.0912            | 0.1008            | 2.4311           | 1.7806           | 0.8234           |
|            | 6   | <i>Planctomycetes</i>      | 0.0926          | 0.3142          | 0.0784          | 0.3664            | 0.1552            | 0.0171            | 1.9241           | 1.6588           | 0.8767           |
|            | 7   | <i>Acidobacteria</i>       | 0.3126          | 0.0992          | 0.1817          | 0.0466            | 0.0239            | 0.0186            | 1.0109           | 0.5959           | 0.7232           |
|            | 8   | <i>Armatimonadetes</i>     | 0.3548          | 0.1906          | 0.0033          | 0.0086            | 0.0068            | 0.0054            | 0.4556           | 0.2879           | 0.4433           |
|            | 9   | <i>Fusobacteria</i>        | 0.0099          | 0.0418          | 0.1117          | 0.0043            | 0.1347            | 0.145             | 0.0684           | 0.1258           | 1.1305           |
|            | 10  | <i>Patescibacteria</i>     | 0.0463          | 0.5144          | 0.1375          | 0.0138            | 0.0026            | 0.0046            | 0.2505           | 0.0393           | 0.0479           |
|            | 11  | <i>Deinococcus-Thermus</i> | 0.1472          | 0.0009          | 0.0992          | 0.0129            | 0.0119            | 0.0496            | 0.0684           | 0.146            | 0.1035           |
|            | 12  | <i>Chlamydiae</i>          | 0               | 0.0017          | 0.0008          | 0.0103            | 0                 | 0.0078            | 0.179            | 0.0604           | 0.0338           |
|            | 13  | <i>Verrucomicrobia</i>     | 0.0504          | 0.000<br>9      | 0.0033          | 0.0034            | 0.0009            | 0                 | 0.0201           | 0.1168           | 0.1078           |
|            | 14  | <i>Tenericutes</i>         | 0               | 0               | 0               | 0                 | 0                 | 0.0023            | 0.001            | 0                | 0.1851           |
|            | 15  | <i>Euryarchaeota</i>       | 0               | 0.1819          | 0               | 0                 | 0                 | 0                 | 0                | 0                | 0.0152           |
|            | 16  | <i>Dadabacteria</i>        | 0               | 0.1062          | 0               | 0                 | 0.0009            | 0.000<br>8        | 0                | 0                | 0.0011           |
| ITS-Phylum | 1   | <i>Ascomycota</i>          | 74.5048         | 70.503<br>2     | 73.768<br>6     | 85.143<br>8       | 73.138<br>6       | 89.342<br>9       | 56.305<br>8      | 60.816<br>3      | 57.425<br>1      |
|            | 2   | <i>Basidiomycota</i>       | 6.6453          | 2.6904          | 2.7312          | 7.0561            | 22.127<br>5       | 6.2362            | 2.4357           | 3.6134           | 2.6295           |
|            | 3   | <i>Anthophyta</i>          | 5.7861          | 8.5481          | 9.7373          | 2.5767            | 0.7604            | 0.4166            | 2.8005           | 3.0943           | 4.0097           |

|           |    |                                                   |        |        |        |             |        |             |             |             |             |
|-----------|----|---------------------------------------------------|--------|--------|--------|-------------|--------|-------------|-------------|-------------|-------------|
| 16S-Genus | 4  | <i>Chlorophyta</i>                                | 0.7861 | 1.2581 | 0.7471 | 0.1476      | 0.0288 | 0.0593      | 2.5753      | 0.7655      | 0.8257      |
|           | 1  | <i>Gluconobacter</i>                              | 0.7212 | 0.7765 | 0.5251 | 57.257<br>9 | 9.8848 | 40.543<br>4 | 2.0207      | 4.4842      | 3.1039      |
|           | 2  | <i>Methylobacterium</i>                           | 8.3057 | 7.3319 | 7.8755 | 2.5993      | 2.8832 | 0.8953      | 19.539<br>1 | 19.985<br>3 | 23.508<br>2 |
|           | 3  | <i>1174-901-12</i>                                | 7.9451 | 6.5198 | 7.5963 | 2.0062      | 0.9395 | 0.6488      | 15.581<br>2 | 13.608<br>7 | 20.648<br>2 |
|           | 4  | <i>Sphingomonas</i>                               | 3.1336 | 2.473  | 1.117  | 0.3707      | 0.2617 | 0.2108      | 4.3894      | 3.9729      | 3.5276      |
|           | 5  | <i>Burkholderia-Caballeronia-Paraburkholderia</i> | 4.1293 | 7.9996 | 2.9808 | 0.3173      | 0.2711 | 0.2325      | 0.8821      | 0.5415      | 0.9867      |
|           | 6  | <i>Hymenobacter</i>                               | 0.9411 | 1.4519 | 0.1209 | 0.0655      | 0.0639 | 0.0279      | 2.4029      | 1.2028      | 0.428       |
|           | 7  | <i>Bdellovibrio</i>                               | 0.5392 | 0.4178 | 0.0834 | 0.0681      | 0.1662 | 0.0248      | 1.5369      | 1.0398      | 1.0738      |
|           | 8  | <i>Tatumella</i>                                  | 0.0686 | 0.0287 | 0.02   | 0.0379      | 0.0477 | 0.0426      | 3.7095      | 0.462       | 0.1797      |
|           | 9  | <i>Massilia</i>                                   | 1.095  | 1.0332 | 0.2742 | 0.0578      | 0.0725 | 0.0659      | 3.1885      | 0.8173      | 0.7602      |
|           | 10 | <i>Methylocella</i>                               | 0.1348 | 0.0357 | 0.1442 | 0.1638      | 0.0315 | 0.0357      | 1.6234      | 0.5365      | 1.4354      |
|           | 11 | <i>Acidiphilium</i>                               | 1.0156 | 0.4422 | 0.8661 | 0.0974      | 0.1236 | 0.1124      | 1.0219      | 0.914       | 0.8419      |
|           | 12 | <i>Jatrophihabitans</i>                           | 0.1232 | 0.1436 | 0.0125 | 0.0914      | 0.3708 | 0.0341      | 0.7343      | 0.7942      | 0.8582      |
|           | 13 | <i>Kineococcus</i>                                | 0.1398 | 0.3395 | 0.135  | 0.0741      | 0.0631 | 0.0295      | 0.3209      | 0.2406      | 0.2647      |
|           | 14 | <i>Spirosoma</i>                                  | 0.8998 | 0.0157 | 0.0058 | 0.031       | 0.0435 | 0.0209      | 0.4094      | 0.459       | 0.3855      |
|           | 15 | <i>Geodermatophilus</i>                           | 0.0157 | 0.0174 | 0.0117 | 0.0362      | 0.046  | 0.0163      | 0.2504      | 0.3291      | 0.1841      |
|           | 16 | <i>Vibrio</i>                                     | 0.1902 | 1.0411 | 0.005  | 0.0448      | 0.0094 | 0.7154      | 1.1869      | 0.0272      | 0.244       |
|           | 17 | <i>Staphylococcus</i>                             | 0.2068 | 0.0122 | 0.2051 | 0.2845      | 0.0358 | 0.024       | 1.8598      | 0.8989      | 0.1688      |
|           | 18 | <i>Acinetobacter</i>                              | 0.8568 | 1.747  | 0.1184 | 0.4156      | 0.0725 | 0.1318      | 0.1308      | 0.1832      | 0.2135      |
|           | 19 | <i>Singulisphaera</i>                             | 0.0116 | 0.0044 | 0.0183 | 0.0897      | 0.0529 | 0.0085      | 0.5673      | 0.6442      | 0.4585      |
|           | 20 | <i>Novosphingobium</i>                            | 0.0637 | 0.0165 | 0.02   | 0.025       | 0.0315 | 0.0163      | 0.1941      | 0.158       | 0.0893      |
|           | 21 | <i>Terriglobus</i>                                | 0.0901 | 0.0514 | 0.1509 | 0.0362      | 0.0171 | 0.0109      | 0.7584      | 0.2204      | 0.5946      |
|           | 22 | <i>Cystobacter</i>                                | 0.0157 | 0.0122 | 0.0092 | 0.0276      | 0.0153 | 0.0248      | 0.4124      | 0.9311      | 1.6304      |
|           | 23 | <i>Streptococcus</i>                              | 0.3085 | 1.1116 | 0.496  | 0.0664      | 0.0247 | 0.0341      | 0.1237      | 0.3563      | 0.2505      |

|    |                          |        |        |        |        |        |        |        |        |        |
|----|--------------------------|--------|--------|--------|--------|--------|--------|--------|--------|--------|
| 24 | <i>Mucilaginibacter</i>  | 0.0595 | 0.0061 | 0.0058 | 0.0854 | 0.0077 | 0.0062 | 1.1919 | 1.0629 | 0.1699 |
| 25 | <i>Actinomycetospora</i> | 0.0058 | 0.0113 | 0.005  | 0.1086 | 0.4186 | 0.014  | 0.4768 | 0.3312 | 0.085  |
| 26 | <i>Quadrisphaera</i>     | 0.0504 | 0.497  | 0.0042 | 0.0276 | 0.0213 | 0.0085 | 0.1358 | 0.0564 | 0.0468 |
| 27 | <i>Labrys</i>            | 0.0447 | 0.0052 | 0.015  | 0.031  | 0.0332 | 0.0209 | 0.0432 | 0.0584 | 0.025  |
| 28 | <i>Bacillus</i>          | 0.1513 | 0.988  | 0.1734 | 0.0129 | 0.0068 | 0.0085 | 0.172  | 0.2949 | 0.1492 |
| 29 | <i>Cetobacterium</i>     | 0.0091 | 0.0418 | 0.1117 | 0.0043 | 0.1347 | 0.145  | 0.0684 | 0.1117 | 1.1305 |
| 30 | <i>Pantoea</i>           | 0.0835 | 0.007  | 0.1659 | 0.019  | 0.0102 | 0.0085 | 0.4627 | 0.0876 | 0.0229 |
| 31 | <i>Dysgonomonas</i>      | 0.0074 | 0.0061 | 2.0539 | 0.0052 | 0.0017 | 0.0101 | 0.008  | 0.0141 | 0.0044 |
| 32 | <i>Brachybacterium</i>   | 0.0579 | 0.0078 | 0.0058 | 0.0069 | 0.9224 | 0.0426 | 0.006  | 0.0262 | 0.1067 |
| 33 | <i>Lapillicoccus</i>     | 0.0058 | 0.1541 | 0.0033 | 0.1828 | 0.1373 | 0.0093 | 0.0634 | 0.0262 | 0.0828 |
| 34 | <i>Bryocella</i>         | 0.1447 | 0.0026 | 0      | 0.006  | 0.0043 | 0.0062 | 0.0825 | 0.156  | 0.0817 |
| 35 | <i>Pseudomonas</i>       | 0.2861 | 0.4622 | 0.105  | 0.019  | 0.0196 | 0.0256 | 0.0956 | 0.1973 | 0.1939 |
| 36 | <i>Enhydrobacter</i>     | 0.0033 | 0.8191 | 0.0625 | 0.119  | 0.0205 | 0.014  | 0.0573 | 0.0846 | 0.0958 |
| 37 | <i>Kocuria</i>           | 0.0893 | 0.0061 | 0.1184 | 0.1121 | 0.0486 | 0.0202 | 0.0956 | 0.0936 | 0.1993 |
| 38 | <i>Lactobacillus</i>     | 0.0637 | 0.3987 | 0.0308 | 0.0009 | 0.0077 | 0.0054 | 0.0372 | 0.0473 | 0.0577 |
| 39 | <i>Deinococcus</i>       | 0.1472 | 0.0009 | 0.0992 | 0.0129 | 0.0119 | 0.0496 | 0.0684 | 0.1449 | 0.1035 |
| 40 | <i>Nocardioides</i>      | 0.0728 | 0.2472 | 0.0392 | 0.0147 | 0.0136 | 0.0093 | 0.0563 | 0.0262 | 0.0163 |
| 41 | <i>Exiguobacterium</i>   | 0.0033 | 0.726  | 0.005  | 0.0069 | 0.0026 | 0.0031 | 0.0694 | 0.0584 | 0.0316 |
| 42 | <i>Corynebacterium_1</i> | 0.005  | 0.3752 | 0.1642 | 0.0052 | 0.0077 | 0.0046 | 0.0553 | 0.0574 | 0.086  |
| 43 | <i>Photobacterium</i>    | 0      | 0.7608 | 0      | 0.0052 | 0.0009 | 0.0031 | 0.0895 | 0      | 0.0098 |
| 44 | <i>Caedibacter</i>       | 0.0017 | 0.0009 | 0.0375 | 0.0043 | 0.0009 | 0.0085 | 0.1116 | 0.1359 | 0.1405 |
| 45 | <i>Cutibacterium</i>     | 0.0686 | 0.0157 | 0.1876 | 0.0147 | 0.006  | 0.0039 | 0.0272 | 0.0664 | 0.0272 |
| 46 | <i>Marmoricola</i>       | 0.0033 | 0.0418 | 0      | 0.0957 | 0.0119 | 0.0031 | 0.2354 | 0.1047 | 0.0087 |
| 47 | <i>Paracoccus</i>        | 0.1935 | 0.175  | 0.0358 | 0.0121 | 0.0102 | 0.0039 | 0.0191 | 0.0181 | 0.0773 |
| 48 | <i>Amnibacterium</i>     | 0.0314 | 0.0409 | 0.0317 | 0.0466 | 0.0614 | 0.0225 | 0.0704 | 0.0533 | 0.0392 |
| 49 | <i>Friedmanniella</i>    | 0.0695 | 0.0705 | 0.0025 | 0.0103 | 0.0196 | 0.0031 | 0.0785 | 0.159  | 0.0316 |
| 50 | <i>Tanticharoenia</i>    | 0.0141 | 0.0157 | 0.0075 | 0.0293 | 0.0827 | 0      | 0.0352 | 0.0362 | 0.0207 |
| 51 | <i>Aureimonas</i>        | 0.0017 | 0.0044 | 0.0017 | 0.1552 | 0.006  | 0.0062 | 0.008  | 0.1862 | 0.0653 |

|    |                                                                 |        |        |        |        |        |        |        |        |        |
|----|-----------------------------------------------------------------|--------|--------|--------|--------|--------|--------|--------|--------|--------|
| 52 | <i>Psychroglacielcola</i>                                       | 0.0025 | 0.0026 | 0.0008 | 0.0112 | 0.0119 | 0.0078 | 0.0201 | 0.0805 | 0.0109 |
| 53 | <i>Geobacter_sp_enrichment_culture_clone_V</i><br><i>anCtrl</i> | 0.0008 | 0      | 0      | 0.0017 | 0.0026 | 0.0047 | 0.2002 | 0.1087 | 0.0381 |
| 54 | <i>Aeromonas</i>                                                | 0.0025 | 0.0427 | 0.0008 | 0.0034 | 0.0477 | 0.1403 | 0.1338 | 0.1067 | 0.086  |
| 55 | <i>Larkinella</i>                                               | 0.0008 | 0      | 0.0008 | 0      | 0      | 0.0023 | 0.4637 | 0.0221 | 0.0022 |
| 56 | <i>Granulicella</i>                                             | 0.0372 | 0      | 0      | 0.0026 | 0.0009 | 0.0008 | 0.1348 | 0.0292 | 0.0185 |
| 57 | <i>Thermobrachium</i>                                           | 0.0521 | 0.3256 | 0.0383 | 0.0052 | 0.0009 | 0.0023 | 0.007  | 0.005  | 0.0033 |
| 58 | <i>Conexibacter</i>                                             | 0.0008 | 0.0009 | 0.0008 | 0.0052 | 0.0017 | 0.0008 | 0.0191 | 0.0282 | 0.0566 |
| 59 | <i>Tepidisphaera</i>                                            | 0      | 0.0026 | 0      | 0      | 0.0026 | 0      | 0.0131 | 0.1057 | 0.0142 |
| 60 | <i>Chryseobacterium</i>                                         | 0.0984 | 0.0897 | 0      | 0.0078 | 0.006  | 0.0186 | 0.0091 | 0.0252 | 0.0392 |
| 61 | <i>Kytococcus</i>                                               | 0.0008 | 0.2916 | 0      | 0.0009 | 0.0026 | 0.0093 | 0.005  | 0.002  | 0.0305 |
| 62 | <i>Rothia</i>                                                   | 0.0017 | 0.2873 | 0.0333 | 0      | 0.0017 | 0      | 0.0111 | 0.0493 | 0.0131 |
| 63 | <i>Enterococcus</i>                                             | 0      | 0.1384 | 0.03   | 0.0009 | 0.0068 | 0.0008 | 0.005  | 0      | 0.0022 |
| 64 | <i>Brevibacterium</i>                                           | 0      | 0.1219 | 0.0734 | 0.0009 | 0.0017 | 0.0333 | 0.0211 | 0.003  | 0.0087 |
| 65 | <i>Rhodococcus</i>                                              | 0.1282 | 0.0017 | 0.0692 | 0.0043 | 0.0009 | 0.0046 | 0.008  | 0.0312 | 0.0065 |
| 66 | <i>Chthoniobacter</i>                                           | 0      | 0.0009 | 0      | 0.0026 | 0.0009 | 0      | 0.0191 | 0.0695 | 0      |
| 67 | <i>Mycobacterium</i>                                            | 0      | 0      | 0.0008 | 0.0086 | 0.0239 | 0      | 0.0211 | 0.1248 | 0      |
| 68 | <i>Stenotrophomonas</i>                                         | 0.1381 | 0.0009 | 0.0017 | 0.025  | 0.0017 | 0.0202 | 0.003  | 0.0101 | 0.0011 |
| 69 | <i>Cytophaga</i>                                                | 0      | 0.2124 | 0.0684 | 0      | 0.0034 | 0.0023 | 0.002  | 0.001  | 0.0011 |
| 70 | <i>Belnapia</i>                                                 | 0.0008 | 0.0566 | 0      | 0.0043 | 0.0026 | 0.0039 | 0.0101 | 0.0232 | 0.0044 |
| 71 | <i>Candidatus_Paracaedibacter</i>                               | 0      | 0      | 0      | 0.0009 | 0.0034 | 0      | 0.0111 | 0.0423 | 0      |
| 72 | <i>Bradyrhizobium</i>                                           | 0.0017 | 0.1184 | 0.015  | 0.0052 | 0.0034 | 0.0039 | 0.007  | 0.0181 | 0.0087 |
| 73 | <i>Siphonobacter</i>                                            | 0      | 0      | 0      | 0.0017 | 0      | 0      | 0.001  | 0.1419 | 0.0904 |
| 74 | <i>Symplocastrum_CPER-KK1</i>                                   | 0.0008 | 0.2211 | 0.0017 | 0.0017 | 0      | 0      | 0.001  | 0.002  | 0.0011 |
| 75 | <i>Mycoplasma</i>                                               | 0      | 0      | 0      | 0      | 0      | 0.0023 | 0.001  | 0      | 0.1851 |
| 76 | <i>Bryobacter</i>                                               | 0      | 0      | 0      | 0      | 0      | 0.0008 | 0.004  | 0.1621 | 0.0283 |
| 77 | <i>Leuconostoc</i>                                              | 0.0008 | 0      | 0.0767 | 0      | 0      | 0      | 0      | 0      | 0      |
| 78 | <i>Salinicoccus</i>                                             | 0.0017 | 0.1811 | 0      | 0      | 0      | 0.0016 | 0      | 0      | 0.0022 |

|           |    |                                 |         |             |             |             |             |             |             |             |             |
|-----------|----|---------------------------------|---------|-------------|-------------|-------------|-------------|-------------|-------------|-------------|-------------|
| ITS-Genus | 79 | <i>Asinibacterium</i>           | 0       | 0.1819      | 0           | 0.0009      | 0.0017      | 0.0023      | 0           | 0           | 0.0011      |
|           | 80 | <i>Aerococcus</i>               | 0.0008  | 0.1314      | 0           | 0           | 0           | 0           | 0.008       | 0.002       | 0.0022      |
|           | 81 | <i>Salinicola</i>               | 0       | 0.1341      | 0.0358      | 0.0043      | 0           | 0.0023      | 0.001       | 0           | 0.0011      |
|           | 82 | <i>Prevotella_1</i>             | 0       | 0.0026      | 0           | 0           | 0           | 0           | 0.005       | 0           | 0.1666      |
|           | 83 | <i>Acidovorax</i>               | 0       | 0.1193      | 0.0008      | 0.0026      | 0.0017      | 0           | 0.0171      | 0.0151      | 0.012       |
|           | 84 | <i>Anaerococcus</i>             | 0       | 0.1219      | 0           | 0.0009      | 0           | 0.0008      | 0.001       | 0.0081      | 0.0272      |
|           | 85 | <i>Carnobacterium</i>           | 0       | 0.1436      | 0.0008      | 0           | 0           | 0.0008      | 0           | 0.001       | 0.0011      |
|           | 86 | <i>Jeotgalibaca</i>             | 0.0008  | 0.1462      | 0           | 0           | 0           | 0.0008      | 0           | 0           | 0           |
|           | 87 | <i>Sungkyunkwania</i>           | 0       | 0.1097      | 0           | 0.0009      | 0           | 0           | 0           | 0.002       | 0.0229      |
|           | 88 | <i>Candidatus_Alysiosphaera</i> | 0.0017  | 0           | 0           | 0.0009      | 0.0017      | 0.0016      | 0.001       | 0.1158      | 0.0076      |
|           | 89 | <i>Actinomyces</i>              | 0       | 0.1088      | 0           | 0.0034      | 0           | 0           | 0.004       | 0.0121      | 0.0011      |
|           | 90 | <i>Dietzia</i>                  | 0.1174  | 0           | 0           | 0.0009      | 0           | 0           | 0           | 0           | 0           |
|           | 91 | <i>Catalinimonas</i>            | 0       | 0.1149      | 0           | 0.0017      | 0           | 0           | 0           | 0           | 0           |
|           | 92 | <i>Hanstruepera</i>             | 0.0008  | 0.1027      | 0           | 0           | 0           | 0           | 0           | 0           | 0           |
|           | 1  | <i>Zasmidium</i>                | 4.318   | 3.6118      | 3.6054      | 20.734      | 10.055<br>7 | 5.4232      | 17.097<br>5 | 12.742<br>6 | 15.465<br>7 |
|           | 2  | <i>Talaromyces</i>              | 0.3911  | 0.7418      | 0.3577      | 32.634<br>7 | 31.037<br>5 | 23.498<br>1 | 1.1929      | 1.2013      | 1.0631      |
|           | 3  | <i>Aspergillus</i>              | 1.5129  | 1.8517      | 5.356       | 9.158       | 20.873      | 47.478<br>4 | 1.2741      | 1.5311      | 3.3888      |
|           | 4  | <i>Uwebraunia</i>               | 25.1654 | 24.764<br>3 | 31.873<br>5 | 0.5276      | 0.4653      | 0.4052      | 7.3601      | 6.741       | 5.4366      |
|           | 5  | <i>Vaccinium</i>                | 5.6723  | 8.1027      | 9.5227      | 2.5558      | 0.7454      | 0.2424      | 2.755       | 3.0609      | 3.9715      |
|           | 6  | <i>Alternaria</i>               | 3.1543  | 4.1218      | 4.0177      | 0.8339      | 0.6516      | 0.4128      | 4.4211      | 7.7851      | 4.0805      |
|           | 7  | <i>Strelitziana</i>             | 3.1154  | 4.4577      | 3.666       | 0.6838      | 0.5728      | 0.4923      | 5.0197      | 4.0372      | 5.9159      |
|           | 8  | <i>Colletotrichum</i>           | 0.359   | 0.0503      | 0.6021      | 1.5755      | 2.6928      | 6.4685      | 0.0844      | 0.1452      | 0.2691      |
|           | 9  | <i>Coniophora</i>               | 0.0117  | 0.0763      | 0.0139      | 0.2386      | 16.815<br>7 | 0.4279      | 0.0043      | 0.4441      | 0.0098      |

|    |                            |        |        |        |        |        |        |        |        |        |
|----|----------------------------|--------|--------|--------|--------|--------|--------|--------|--------|--------|
| 10 | <i>Aureobasidium</i>       | 7.2028 | 4.5978 | 4.9755 | 0.048  | 0.0513 | 0.0896 | 0.7285 | 1.0941 | 0.5436 |
| 11 | <i>Phaeophleospora</i>     | 0.4583 | 0.6537 | 0.5981 | 0.4797 | 0.5891 | 0.4393 | 1.9475 | 1.7466 | 1.9705 |
| 12 | <i>Irpex</i>               | 0.2413 | 0.0314 | 0.0119 | 0.1033 | 0.1088 | 5.1531 | 0.0108 | 0.006  | 0.1111 |
| 13 | <i>Neofusicoccum</i>       | 0.0234 | 0.0224 | 0.3746 | 0.0074 | 0.0063 | 0.0063 | 0.0065 | 0.0131 | 0.0033 |
| 14 | <i>Botryosphaeria</i>      | 0.2355 | 0.3763 | 0.0268 | 0.0283 | 0.0263 | 0.0063 | 0.0119 | 0.0155 | 0.0109 |
| 15 | <i>Schizophyllum</i>       | 0.108  | 0.0054 | 0.0129 | 5.5592 | 0.5803 | 0.2133 | 0.1602 | 0.0179 | 0.0207 |
| 16 | <i>Passalora</i>           | 1.2668 | 4.4424 | 2.0347 | 0.0738 | 0.0513 | 0.053  | 0.6582 | 0.9286 | 0.7189 |
| 17 | <i>Candida</i>             | 0.0778 | 0.0045 | 0.0666 | 0.0713 | 0.0088 | 0.125  | 0.2587 | 0.2548 | 0.085  |
| 18 | <i>Erythrobasidium</i>     | 1.7007 | 0.9321 | 0.8743 | 0.0357 | 0.0575 | 0.0467 | 0.4774 | 1.0298 | 0.7244 |
| 19 | <i>Neocladothialophora</i> | 0.1265 | 0.123  | 0.0387 | 0.0787 | 0.07   | 0.0745 | 0.6441 | 0.2191 | 0.3072 |
| 20 | <i>Starmerella</i>         | 0      | 0.0018 | 0.004  | 5.7277 | 0.0163 | 0.0227 | 0.0779 | 0.0036 | 0      |
| 21 | <i>Ascochyta</i>           | 0.4544 | 0.4894 | 0.4282 | 0.043  | 0.0425 | 0.0505 | 0.6636 | 0.5893 | 0.4989 |
| 22 | <i>Sphaerulina</i>         | 1.5509 | 1.3335 | 0.91   | 0.0037 | 0.0088 | 0.0126 | 0.1212 | 0.1833 | 0.1492 |
| 23 | <i>Papiliotrema</i>        | 0.2608 | 0.2416 | 0.1778 | 0.0726 | 0.05   | 0.0644 | 0.5759 | 0.4977 | 0.4858 |
| 24 | <i>Zygoascus</i>           | 0      | 0.0009 | 0      | 4.0612 | 0.1026 | 0.0619 | 0.0639 | 0.0048 | 0.0044 |
| 25 | <i>Pestalotiopsis</i>      | 0.1012 | 0.0153 | 0.0358 | 0.1181 | 0.1351 | 0.6325 | 0.053  | 0.181  | 0.1089 |
| 26 | <i>Camptophora</i>         | 0.4845 | 0.5011 | 0.2623 | 0.032  | 0.0263 | 0.029  | 0.5304 | 0.0583 | 0.0839 |
| 27 | <i>Dioszegia</i>           | 0.1703 | 0.0673 | 0.1262 | 0.0307 | 0.0188 | 0.0379 | 0.367  | 0.4084 | 0.5305 |
| 28 | <i>Paraconiothyrium</i>    | 0.7696 | 0.3951 | 0.308  | 0.0332 | 0.0075 | 0.0101 | 0.144  | 0.1191 | 0.1133 |
| 29 | <i>Neopestalotiopsis</i>   | 0.2209 | 0.0907 | 0.0179 | 0.0197 | 0.0113 | 0.0114 | 0.0292 | 0.0845 | 0.0534 |
| 30 | <i>Phlebiopsis</i>         | 0      | 0.0467 | 0      | 0      | 0.0013 | 0      | 0.0011 | 0      | 0      |
| 31 | <i>Cryptococcus</i>        | 1.2434 | 0.2694 | 0.1272 | 0.0049 | 0.005  | 0.005  | 0.1396 | 0.1107 | 0.0708 |
| 32 | <i>Pichia</i>              | 0.0068 | 0.0009 | 0      | 0.6027 | 1.2845 | 0.0518 | 0.0097 | 0.0238 | 0.0185 |
| 33 | <i>Golubevia</i>           | 0.1946 | 0.0548 | 0.1073 | 0.032  | 0.0375 | 0.0164 | 0.131  | 0.3298 | 0.1307 |
| 34 | <i>Peniophora</i>          | 0.036  | 0      | 0.006  | 0.0271 | 0.0075 | 0.0076 | 0.0097 | 0      | 0.0109 |
| 35 | <i>Pseudocercospora</i>    | 0.2452 | 0.1293 | 0.1917 | 0.0234 | 0.0213 | 0.0076 | 0.0498 | 0.1    | 0.0664 |
| 36 | <i>Rhodosporidiobolus</i>  | 1.1627 | 0.1275 | 0.0477 | 0      | 0      | 0      | 0.0141 | 0.025  | 0.0294 |
| 37 | <i>Trebouxia</i>           | 0.0681 | 0.5855 | 0.155  | 0.0123 | 0.0025 | 0.0063 | 0.2317 | 0.0512 | 0.0545 |



|    |                          |        |        |        |        |        |        |        |        |        |
|----|--------------------------|--------|--------|--------|--------|--------|--------|--------|--------|--------|
| 38 | <i>Zygosaccharomyces</i> | 0      | 0.0009 | 0.0179 | 0.0025 | 0.0063 | 0.0694 | 0.0011 | 0.0012 | 0.0044 |
| 39 | <i>Hanseniaspora</i>     | 0.0146 | 0.0135 | 0.004  | 0.0086 | 0.454  | 0.0076 | 0.0314 | 0.1119 | 0.0675 |
| 40 | <i>Ramichloridium</i>    | 0.0302 | 0.0314 | 0.0199 | 0.0148 | 0.0213 | 0.0177 | 0.0617 | 0.0167 | 0.0142 |
| 41 | <i>Ramularia</i>         | 0.288  | 0.3538 | 0.1133 | 0.0037 | 0      | 0      | 0.0271 | 0.0167 | 0.0305 |
| 42 | <i>Sporobolomyces</i>    | 0.2919 | 0.1392 | 0.304  | 0.0025 | 0.0013 | 0      | 0.0379 | 0.0441 | 0.0359 |
| 43 | <i>Penicillium</i>       | 0.001  | 0      | 0.0159 | 0.3837 | 0.0113 | 0.0114 | 0.0119 | 0.0024 | 0      |
| 44 | <i>Periconia</i>         | 0.0983 | 0.0952 | 0.0974 | 0.0111 | 0.0113 | 0.005  | 0.0963 | 0.1    | 0.0861 |
| 45 | <i>Keissleriella</i>     | 0.0097 | 0.0153 | 0.0139 | 0.0062 | 0.0175 | 0.0114 | 0.0574 | 0.1691 | 0.1623 |
| 46 | <i>Phyllozyma</i>        | 0.144  | 0.0323 | 0.4073 | 0.0037 | 0.0025 | 0      | 0.0292 | 0.0488 | 0.0229 |
| 47 | <i>Leptospora</i>        | 0.0311 | 0.0314 | 0.1023 | 0.0111 | 0.0138 | 0.0088 | 0.0714 | 0.0667 | 0.0741 |
| 48 | <i>Taphrina</i>          | 0.1099 | 0.0925 | 0.0318 | 0.0062 | 0.005  | 0.0076 | 0.0444 | 0.075  | 0.085  |
| 49 | <i>Stagonospora</i>      | 0.0107 | 0.0144 | 0.0238 | 0.0086 | 0.0075 | 0.0063 | 0.0704 | 0.0786 | 0.1166 |
| 50 | <i>Agriophyllum</i>      | 0.0107 | 0.1814 | 0.0378 | 0.0037 | 0.0063 | 0.1692 | 0.0022 | 0.0012 | 0.0163 |
| 51 | <i>Dissoconium</i>       | 0.2179 | 0.1625 | 0.0318 | 0.0012 | 0      | 0.0013 | 0.0227 | 0.0226 | 0.0218 |
|    |                          |        |        |        |        |        |        |        | 0      |        |
| 52 | <i>Xenoacremonium</i>    | 0.0019 | 0      | 0.0238 | 0      | 0.0013 | 0.0025 | 0      |        | 0      |
| 53 | <i>Diaporthe</i>         | 0.2092 | 0.0638 | 0.0278 | 0.0049 | 0.0125 | 0.0025 | 0.0162 | 0.0131 | 0.0087 |
| 54 | <i>Sphaceloma</i>        | 0.0156 | 0.0539 | 0.153  | 0.0062 | 0.0013 | 0.0025 | 0.0227 | 0.0631 | 0.0185 |
| 55 | <i>Filobasidium</i>      | 0.1197 | 0.0898 | 0.0646 | 0.0012 | 0.0013 | 0.0013 | 0.0097 | 0.0286 | 0.0076 |
| 56 | <i>Pseudoveronaea</i>    | 0.0749 | 0.1338 | 0.0189 | 0      | 0      | 0      | 0.0087 | 0.0024 | 0.0109 |
| 57 | <i>Anthracoystis</i>     | 0      | 0      | 0      | 0      | 0      | 0      | 0.0032 | 0      | 0.0044 |
| 58 | <i>Meira</i>             | 0.1411 | 0.0099 | 0.0129 | 0      | 0      | 0      | 0.0011 | 0      | 0.0033 |
| 59 | <i>Microstroma</i>       | 0.0068 | 0.1203 | 0.004  | 0      | 0      | 0      | 0      | 0.0095 | 0.0011 |

---

Table S2. Top 10 bacterial genera with the highest relative abundance in each group. Means with standard deviation are shown. Different lowercase letters (a, b, c) in the same line indicate significant difference ( $p < 0.05$ ) of means between groups.

| Group  |                                            | CK (%)                   | T25 (%)                  | T4 (%)                   |
|--------|--------------------------------------------|--------------------------|--------------------------|--------------------------|
| Phylum | Proteobacteria                             | 37.15±3.83 <sup>c</sup>  | 89.96±1.63 <sup>a</sup>  | 64.13±2.70 <sup>b</sup>  |
|        | Cyanobacteria                              | 50.59±6.06 <sup>a</sup>  | 4.7±0.48 <sup>b</sup>    | 16.71±3.02 <sup>b</sup>  |
|        | Actinobacteria                             | 3.99±1.09 <sup>b</sup>   | 4.54±1.88 <sup>b</sup>   | 10.08±2.20 <sup>a</sup>  |
|        | Bacteroidetes                              | 2.66±0.23 <sup>a</sup>   | 0.19±0.03 <sup>b</sup>   | 3.11±0.86 <sup>a</sup>   |
|        | Firmicutes                                 | 2.30±1.25 <sup>a</sup>   | 0.19±0.096 <sup>a</sup>  | 1.68±0.47 <sup>a</sup>   |
|        | Planctomycetes                             | 0.16±0.0.08 <sup>b</sup> | 0.18±0.0.10 <sup>b</sup> | 0.54±0.0.31 <sup>a</sup> |
|        | Acidobacteria                              | 0.2±0.06 <sup>b</sup>    | 0.03±0.009 <sup>b</sup>  | 0.78±0.12 <sup>a</sup>   |
|        | Armatimonadetes                            | 0.18±0.10 <sup>ab</sup>  | 0.0069±0.00 <sup>b</sup> | 0.40±0.05 <sup>a</sup>   |
|        | Fusobacteria                               | 0.055±0.03 <sup>a</sup>  | 0.095±0.045 <sup>a</sup> | 0.445±0.34 <sup>a</sup>  |
|        | Patescibacteria                            | 0.23±0.14 <sup>a</sup>   | 0.007±0.00 <sup>a</sup>  | 0.11±0.07 <sup>a</sup>   |
| Genus  | Gluconobacter                              | 0.67±0.08 <sup>b</sup>   | 35.9±13.87 <sup>a</sup>  | 3.2±0.71 <sup>b</sup>    |
|        | Methylobacterium                           | 7.84±0.28 <sup>b</sup>   | 2.13±0.62 <sup>c</sup>   | 21.01±1.26 <sup>a</sup>  |
|        | 1174-901-12                                | 7.35±0.43 <sup>b</sup>   | 1.2±0.41 <sup>c</sup>    | 16.61±2.10 <sup>a</sup>  |
|        | Sphingomonas                               | 2.24±0.59 <sup>b</sup>   | 0.28±0.05 <sup>c</sup>   | 3.96±0.25 <sup>a</sup>   |
|        | Burkholderia-Caballeronia-Paraburkholderia | 5.04±1.52 <sup>a</sup>   | 0.27±0.02 <sup>b</sup>   | 0.8±0.13 <sup>b</sup>    |
|        | Hymenobacter                               | 0.84±0.39 <sup>a</sup>   | 0.05±0.012 <sup>a</sup>  | 1.34±0.57 <sup>a</sup>   |
|        | Bdellovibrio                               | 0.35±0.14 <sup>b</sup>   | 0.086±0.04 <sup>b</sup>  | 1.22±0.16 <sup>a</sup>   |
|        | Tatumella                                  | 0.039±0.15 <sup>a</sup>  | 0.043±0.00 <sup>a</sup>  | 1.45±1.13 <sup>a</sup>   |
|        | Massilia                                   | 0.8008±0.26 <sup>a</sup> | 0.0654±0.00 <sup>a</sup> | 1.5887±0.8 <sup>a</sup>  |
|        | Methylocella                               | 0.1±0.03 <sup>b</sup>    | 0.08±0.04 <sup>b</sup>   | 1.2±0.34 <sup>a</sup>    |

Table S3. Top 10 fungal genera with the highest relative abundance in each group. Means with standard deviation are shown. Different lowercase letters (a, b, c) in the same line indicate significant difference ( $p < 0.05$ ) of means between groups.

| Group  |                | CK                      | T25                      | T4                      |
|--------|----------------|-------------------------|--------------------------|-------------------------|
| Phylum | Ascomycota     | 72.93±1.23 <sup>a</sup> | 82.54±4.86 <sup>a</sup>  | 58.18±1.36 <sup>b</sup> |
|        | Basidiomycota  | 4.02±1.31 <sup>b</sup>  | 11.81±5.17 <sup>a</sup>  | 2.89±0.36 <sup>b</sup>  |
|        | Anthophyta     | 8.02±1.17 <sup>a</sup>  | 1.25±0.67 <sup>b</sup>   | 3.3±0.36 <sup>b</sup>   |
|        | Chlorophyta    | 0.93±0.16 <sup>ab</sup> | 0.08±0.04 <sup>b</sup>   | 1.39±0.59 <sup>a</sup>  |
| Genus  | Zasmidium      | 3.85±0.24 <sup>b</sup>  | 12.07±4.53 <sup>ab</sup> | 15.1±1.27 <sup>a</sup>  |
|        | Talaromyces    | 0.5±0.12 <sup>b</sup>   | 29.06±2.82 <sup>a</sup>  | 1.15±0.05 <sup>b</sup>  |
|        | Aspergillus    | 2.91±1.23 <sup>b</sup>  | 25.84±11.34 <sup>a</sup> | 2.06±0.67 <sup>b</sup>  |
|        | Uwebraunia     | 27.27±2.31 <sup>a</sup> | 0.47±0.04 <sup>c</sup>   | 6.51±0.57 <sup>b</sup>  |
|        | Vaccinium      | 7.77±1.12 <sup>a</sup>  | 1.18±0.70 <sup>b</sup>   | 3.26±0.37 <sup>b</sup>  |
|        | Alternaria     | 3.76±0.31 <sup>a</sup>  | 0.63±0.12 <sup>b</sup>   | 5.43±1.18 <sup>a</sup>  |
|        | Strelitziana   | 3.75±0.39 <sup>a</sup>  | 0.58±0.06 <sup>b</sup>   | 5.00±0.54 <sup>a</sup>  |
|        | Colletotrichum | 0.34±0.16 <sup>b</sup>  | 3.58±1.48 <sup>a</sup>   | 0.17±0.05 <sup>b</sup>  |
|        | Coniophora     | 0.03±0.021 <sup>a</sup> | 5.83±0.021 <sup>a</sup>  | 0.15±0.15 <sup>a</sup>  |
|        | Aureobasidium  | 5.6±0.81 <sup>a</sup>   | 0.06±0.01 <sup>b</sup>   | 0.79±0.16 <sup>b</sup>  |
